# Supplementary material
Source: MDPI journal article supplement (https://www.mdpi.com/1999-4907/15/1/163)
Supplement: s1 [file s1]

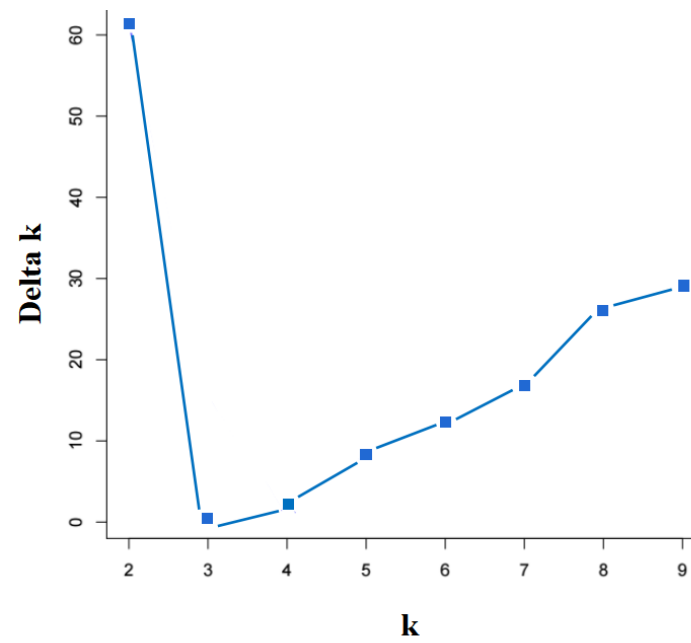

**Figure S2.** Delta  $K$  values for different numbers of populations assumed in the STRUCTURE analysis.
