# Supplementary material
Source: MDPI journal article supplement (https://www.mdpi.com/1999-4907/15/1/163)

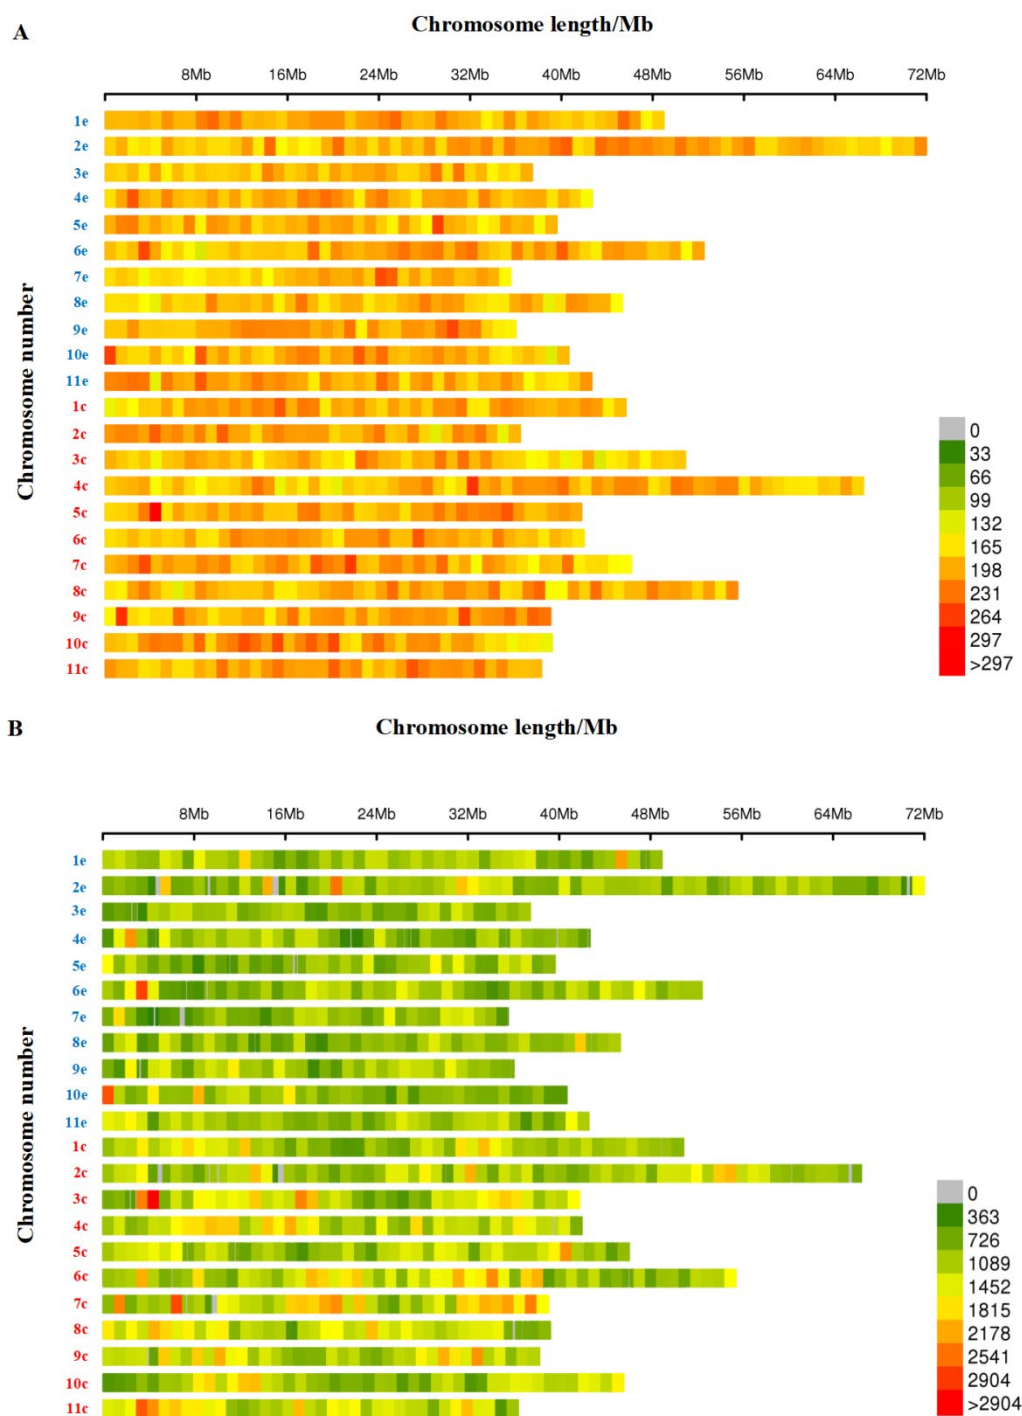

**Figure S1.** Distribution of SLAF labels (A) and SNP markers (B) on reference genome chromosomes

Supplement: s1 [file s1]
